# Supplementary material for: Development of a nanobody tagged with streptavidin-binding peptide and its application in a Luminex fluoroimmunoassay for alpha fetal protein in serum
Source: Royal Society of Chemistry journal article supplement (doi:10.1039/d0ra04210b), 2020-01-01
Supplement: d0ra04210b1.pdf [file d0ra04210b1.pdf]

1 Electronic Supplementary Material (ESI) for RSC Advances.

2 This journal is © The Royal Society of Chemistry 2020

3

4

## Supporting Information

5 **Development of a nanobody tagged with streptavidin-binding peptide and its**

6 **application in a Luminex fluoroimmunoassay for alpha fetal protein in serum**

7 Qi Chen,<sup>a</sup> Danyang Sun,<sup>a</sup> Hua Pei,<sup>b</sup> Benchao Su,<sup>a</sup> Kunlu Bao,<sup>a</sup> Hongmei Cao,<sup>a</sup>

8 Chenghui Zhang,<sup>a</sup> Bruce D. Hammock,<sup>c</sup> Xing Liu,<sup>\*a</sup>

9 <sup>a</sup>. College of Food Science and Engineering, Hainan University, Haikou 570228, China;

10 qichen@hainanu.edu.cn; sdy@hainanu.edu.cn; benchao312@hainanu.edu.cn;

11 baokunlu@hainanu.edu.cn; hmcao@hainanu.edu.cn; zchlm@163.com;

12 xliu@hainanu.edu.cn.

13 <sup>b</sup>. Department of Clinical Laboratory, The Second Affiliated Hospital of Hainan

14 Medical University, Haikou 570311, China; phzmmh61@aliyun.com.

15 <sup>c</sup>. Department of Entomology and Nematology and UCD Comprehensive Cancer

16 Center, University of California, Davis, California 95616, United States;

17 bdhammock@ucd.edu.

18

19

20

21 \* To whom correspondence should be addressed

22 Dr. Xing Liu

23 Tel.: +86-898-66193581

24 Fax: +86-898-66193581

25 E-mail: xliu@hainanu.edu.cn (X.L.).

26 **List of contents:**

- 27 1. The 1st round PCR system (Table S1)
- 28 2. The 2nd round PCR system (Table S2)
- 29 3. The biopanning conditions for the selection of AFP-specific VHH phages (Table S3)
- 30 4. The enrichment of phage in three rounds biopanning (Table S4)
- 31 5. The validation of monoclonal antibody-conjugated magnetic microspheres (Figure
- 32 S1)
- 33 6. The screening of paired antibodies based on Luminex-200 system (Table S5)
- 34 7. The orthogonal test for parameter optimization of the NS-LFIA (Table S6)
- 35 8. The selectivity of the NS-LFIA (Table S7)
- 36 9. The LOD of the NS-LFIA (Table S8)

37 **Table S1** The 1st round PCR system

| Reagent                            | Volum ( $\mu\text{L}$ ) |
|------------------------------------|-------------------------|
| 5 $\times$ Prime STAR Buffer       | 5.0                     |
| dNTP Mixture (2.5 mM each)         | 2.0                     |
| Prime AlpVh-LD                     | 1.0                     |
| Prime CH2-R                        | 1.0                     |
| Prime STAR (2.5 U/ $\mu\text{L}$ ) | 0.25                    |
| cDNA                               | 1.0                     |
| H <sub>2</sub> O                   | 14.75                   |

38

39 **Table S2** The 2nd round PCR system

| Reagent                            | Volum ( $\mu\text{L}$ ) |
|------------------------------------|-------------------------|
| 5 $\times$ Prime STAR Buffer       | 5.0                     |
| dNTP Mixture (2.5 mM each)         | 2.0                     |
| Prime Alp-Vh-F1                    | 1.0                     |
| Prime AlpVhh-R1/AlpVhh-R2          | 1.0                     |
| Prime STAR (2.5 U/ $\mu\text{L}$ ) | 0.25                    |
| cDNA                               | 1.0                     |
| H <sub>2</sub> O                   | 14.75                   |

40

41 **Table S3** The biopanning conditions for the selection of AFP-specific VHH phages

| Rounds | AFP concentration<br>( $\mu\text{g/mL}$ ) | Blocking<br>solution | Input phage<br>(cfu) | incubation<br>time | PBST<br>concentration | PBST washing<br>times | PBS washing<br>times |
|--------|-------------------------------------------|----------------------|----------------------|--------------------|-----------------------|-----------------------|----------------------|
| 1      | 10                                        | 3% BSA               | $5.0 \times 10^{11}$ | 1.5 h              | 0.1%                  | 8                     | 8                    |
| 2      | 5                                         | 3% OVA               | $5.0 \times 10^{11}$ | 1 h                | 0.25%                 | 12                    | 12                   |
| 3      | 2.5                                       | 3% BSA               | $5.0 \times 10^{11}$ | 1 h                | 0.5%                  | 15                    | 15                   |

42

43

44 **Table S4** The enrichment of phage in three rounds biopanning

| Rounds | AFP concentration<br>( $\mu\text{g/mL}$ ) | Input phage<br>(cfu) | Output phage<br>(cfu) | Recovery rate | Enrichment |
|--------|-------------------------------------------|----------------------|-----------------------|---------------|------------|
| 1      | 10                                        | $5.0 \times 10^{11}$ | $1.8 \times 10^6$     | 0.0036‰       | -          |
| 2      | 5                                         | $5.0 \times 10^{11}$ | $3.1 \times 10^8$     | 0.62‰         | 172.22     |
| 3      | 2.5                                       | $5.0 \times 10^{11}$ | $1.6 \times 10^9$     | 3.2‰          | 5.16       |

Recovery rate=Output phage particles/Input phage particles; Enrichment=The later round of recovery rate/The former round of recovery rate

45

46

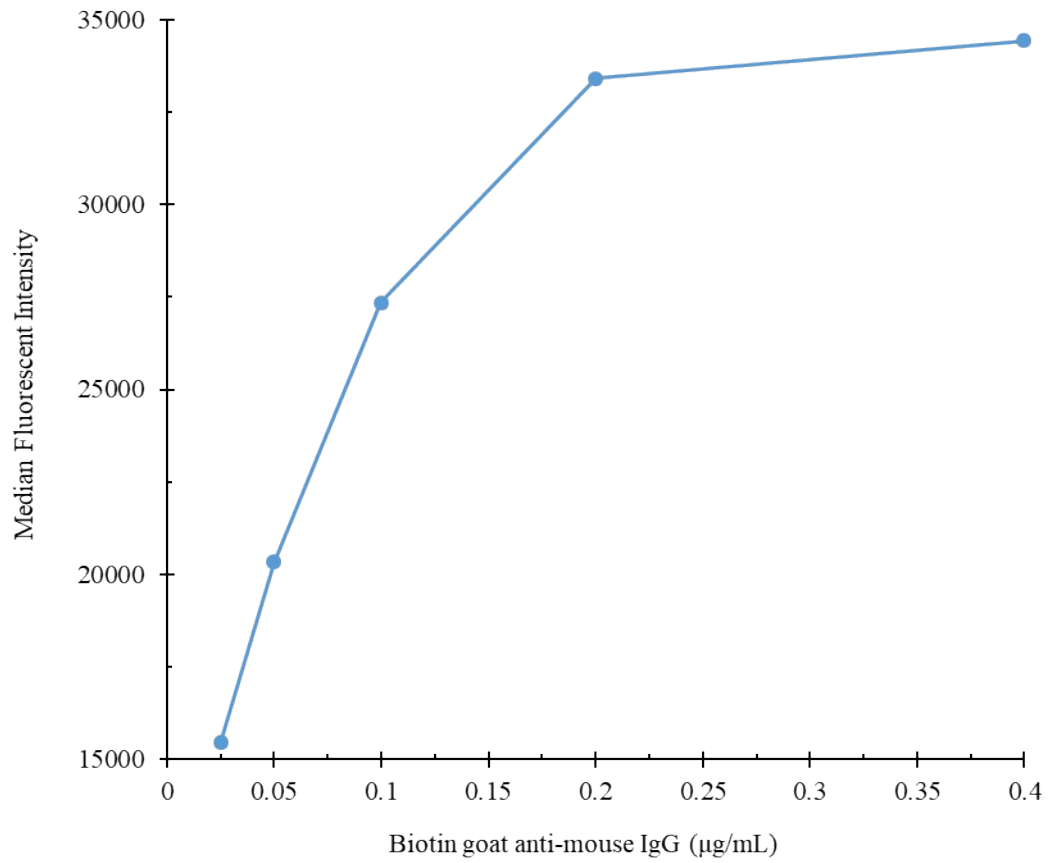

47

**F**

48 **figure S1** The validation of monoclonal antibody-conjugated magnetic microspheres.

49 **Table S5** The screening of paired antibodies based on Luminex-200 system

| Samples               | 14 Monoclonal Antibodies of AFP |        |          |         |         |      |      |        |         |          |      |          |      |          |
|-----------------------|---------------------------------|--------|----------|---------|---------|------|------|--------|---------|----------|------|----------|------|----------|
|                       | M3008-1                         | 100015 | LDZL0001 | H036001 | M3008-2 | 4A3  | 5H7  | 100014 | H036002 | 5153-01M | XA2  | 6483-01M | XFPA | JFZL0002 |
| Control               | 23                              | 25     | 12.5     | 20      | 25      | 17.5 | 23.5 | 26     | 19      | 29       | 22.5 | 18       | 20   | 18       |
| Sample 1 (4.88 ng/mL) | 26                              | 32     | 14       | 23      | 23.5    | 16.5 | 45   | 24     | 20      | 24       | 21.5 | 21.5     | 19.5 | 17.5     |
| Sample 2 (62.7 ng/mL) | 402                             | 644.5  | 77       | 254     | 38      | 31   | 951  | 73     | 39      | 37.5     | 38   | 171.5    | 40   | 22.5     |

50



**Table S6** The orthogonal test for parameter optimization of the NS-LFIA

| Treatment Name | Factors                      |                             |                            | Results |
|----------------|------------------------------|-----------------------------|----------------------------|---------|
|                | mAb-5H7 ( $\mu\text{g/mL}$ ) | A1-SBP ( $\mu\text{g/mL}$ ) | SA-PE ( $\mu\text{g/mL}$ ) |         |
| 1              | 2.5                          | 1                           | 1.5                        | 447     |
| 2              | 2.5                          | 2                           | 2.5                        | 514.5   |
| 3              | 2.5                          | 3                           | 3.5                        | 640.5   |
| 4              | 5                            | 1                           | 2.5                        | 569.5   |
| 5              | 5                            | 2                           | 3.5                        | 694.5   |
| 6              | 5                            | 3                           | 1.5                        | 457     |
| 7              | 10                           | 1                           | 3.5                        | 581     |
| 8              | 10                           | 2                           | 1.5                        | 476     |
| 9              | 10                           | 3                           | 2.5                        | 507.5   |

53 **Table S7** The selectivity of the NS-LFIA

| Cancer Biomarkers | Spiked Concentration | Median Fluorescent Intensity | Recovered concentration (ng/ml) |
|-------------------|----------------------|------------------------------|---------------------------------|
| AFP               | 50 ng/mL             | 1708                         | 49.7                            |
| CA12-5            | 1 µg/mL              | 25                           | 0.14                            |
| CA15-3            | 1 µg/mL              | 25                           | 0.14                            |
| CA19-9            | 1 µg/mL              | 26                           | 0.18                            |
| CEA               | 1 µg/mL              | 24                           | 0.09                            |
| CY21-1            | 1 µg/mL              | 24                           | 0.09                            |
| HE4               | 1 µg/mL              | 25.5                         | 0.16                            |
| PSA               | 1 µg/mL              | 27                           | 0.22                            |
| SCCA              | 1 µg/mL              | 24.5                         | 0.12                            |
| Blank control     | 0                    | 24                           | 0.09                            |

54

55

56 **Table S8** The LOD of the NS-LFIA.

| AFP Concentration (ng/mL) | Median Fluorescence Intensity (MFI) | Calculated Concentration (ng/mL) | Mean $\pm$ SD (ng/mL) | LOD (ng/mL) |
|---------------------------|-------------------------------------|----------------------------------|-----------------------|-------------|
| 0                         | 25                                  | 0.136                            |                       |             |
|                           | 23.5                                | 0.074                            |                       |             |
|                           | 22                                  | 0.011                            |                       |             |
|                           | 20.5                                | -0.051                           |                       |             |
|                           | 21                                  | -0.030                           |                       |             |
|                           | 21                                  | -0.030                           |                       |             |
|                           | 21                                  | -0.030                           |                       |             |
|                           | 20                                  | -0.072                           |                       |             |
|                           | 26                                  | 0.178                            |                       |             |
|                           | 22                                  | 0.011                            | -0.00020875           | 0.237       |
|                           | 23                                  | 0.053                            | $\pm 0.079$           |             |
|                           | 20                                  | -0.072                           |                       |             |
|                           | 23.5                                | 0.074                            |                       |             |
|                           | 20                                  | -0.072                           |                       |             |
|                           | 19                                  | -0.114                           |                       |             |
|                           | 19.5                                | -0.093                           |                       |             |
|                           | 21                                  | -0.030                           |                       |             |
|                           | 20.5                                | -0.051                           |                       |             |
|                           | 24                                  | 0.095                            |                       |             |
|                           | 22                                  | 0.011                            |                       |             |

57
